# Supplementary material for: Role of microRNAs and microRNA machinery in the pathogenesis of diffuse large B-cell lymphoma
Source: PubMed Central journal article supplement — Blood Cancer J. 2013 Oct 11;3(10):e152–. doi: 10.1038/bcj.2013.49 (PMC3816210; doi:10.1038/bcj.2013.49), 2013-10-11
Supplement: bcj201349x1.pdf [file bcj201349x1.pdf]

# Supplementary data

## **Role of microRNAs and microRNA machinery in the pathogenesis of diffuse large B-cell lymphoma**

Stefano Caramuta, Linkiat Lee, Deniz M. Özata, Pinar Akçakaya, Patrik Georgii-Hemming,  
Hong Xie, Rose-Marie Amini, Charles H. Lawrie, Gunilla Enblad, Catharina Larsson, Mattias  
Berglund and Weng-Onn Lui

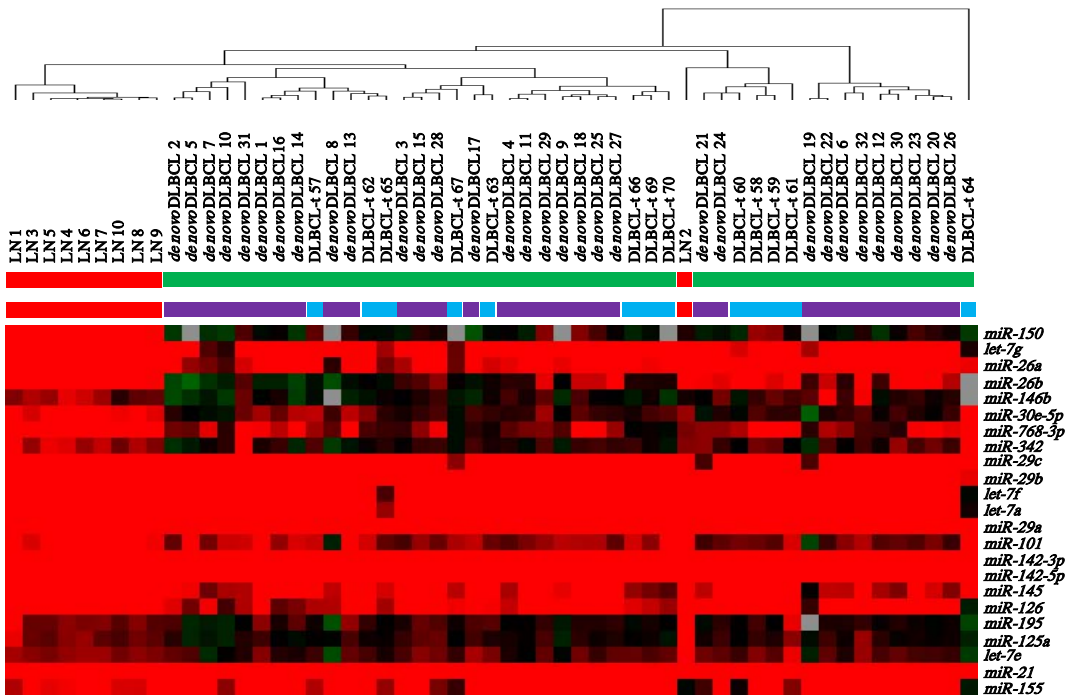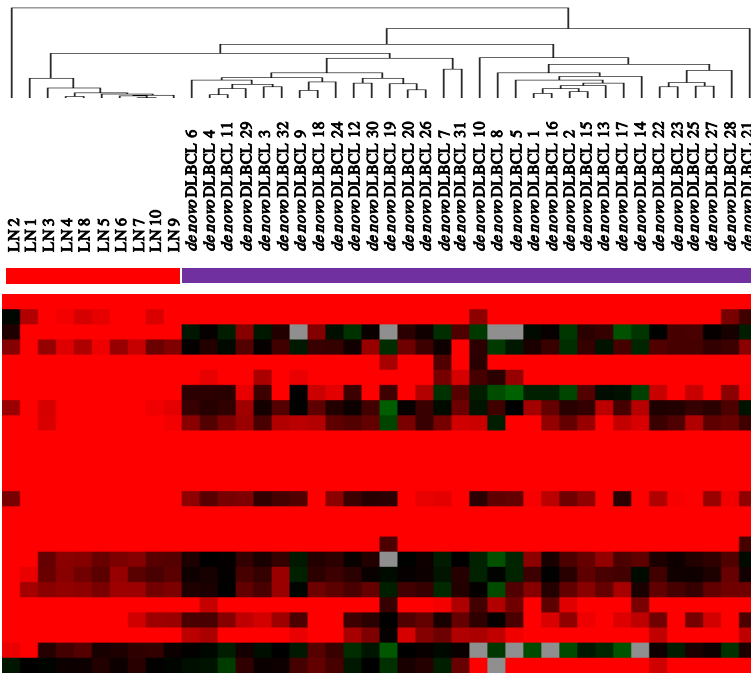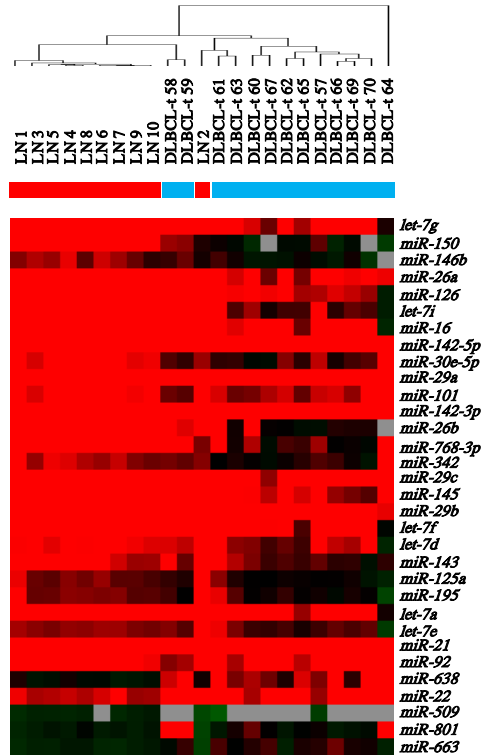

■ Lymph nodes (LNs)  
■ DLBCLs  
■ *de novo* DLBCLs  
■ Transformed DLBCLs

■ -0.02      0.00      ■ 0.02

**Figure S1.** Supervised clustering of miRNA expression based on PAM analysis (cohort 1). The heat maps were generated using sets of miRNAs obtained by PAM analysis that could best distinguish different tumor groups from LNs. Median centered LN values for each miRNA are represented. The green and red colors indicate relatively low and high expression, respectively. Missing values are indicated in grey.

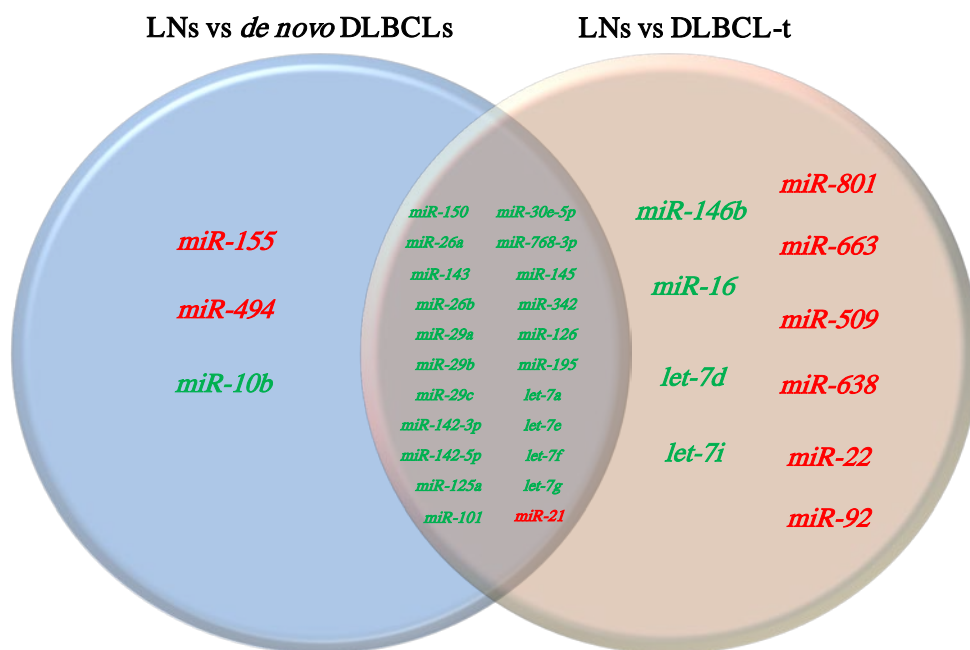

**Figure S2.** Deregulated miRNAs in *de novo* and transformed DLBCLs as compared to LNs. The Venn diagram shows miRNAs specifically or commonly deregulated in *de novo* and transformed DLBCL cases in comparison to LNs. Over-expressed or under-expressed miRNAs in tumors are labeled in red or green, respectively.

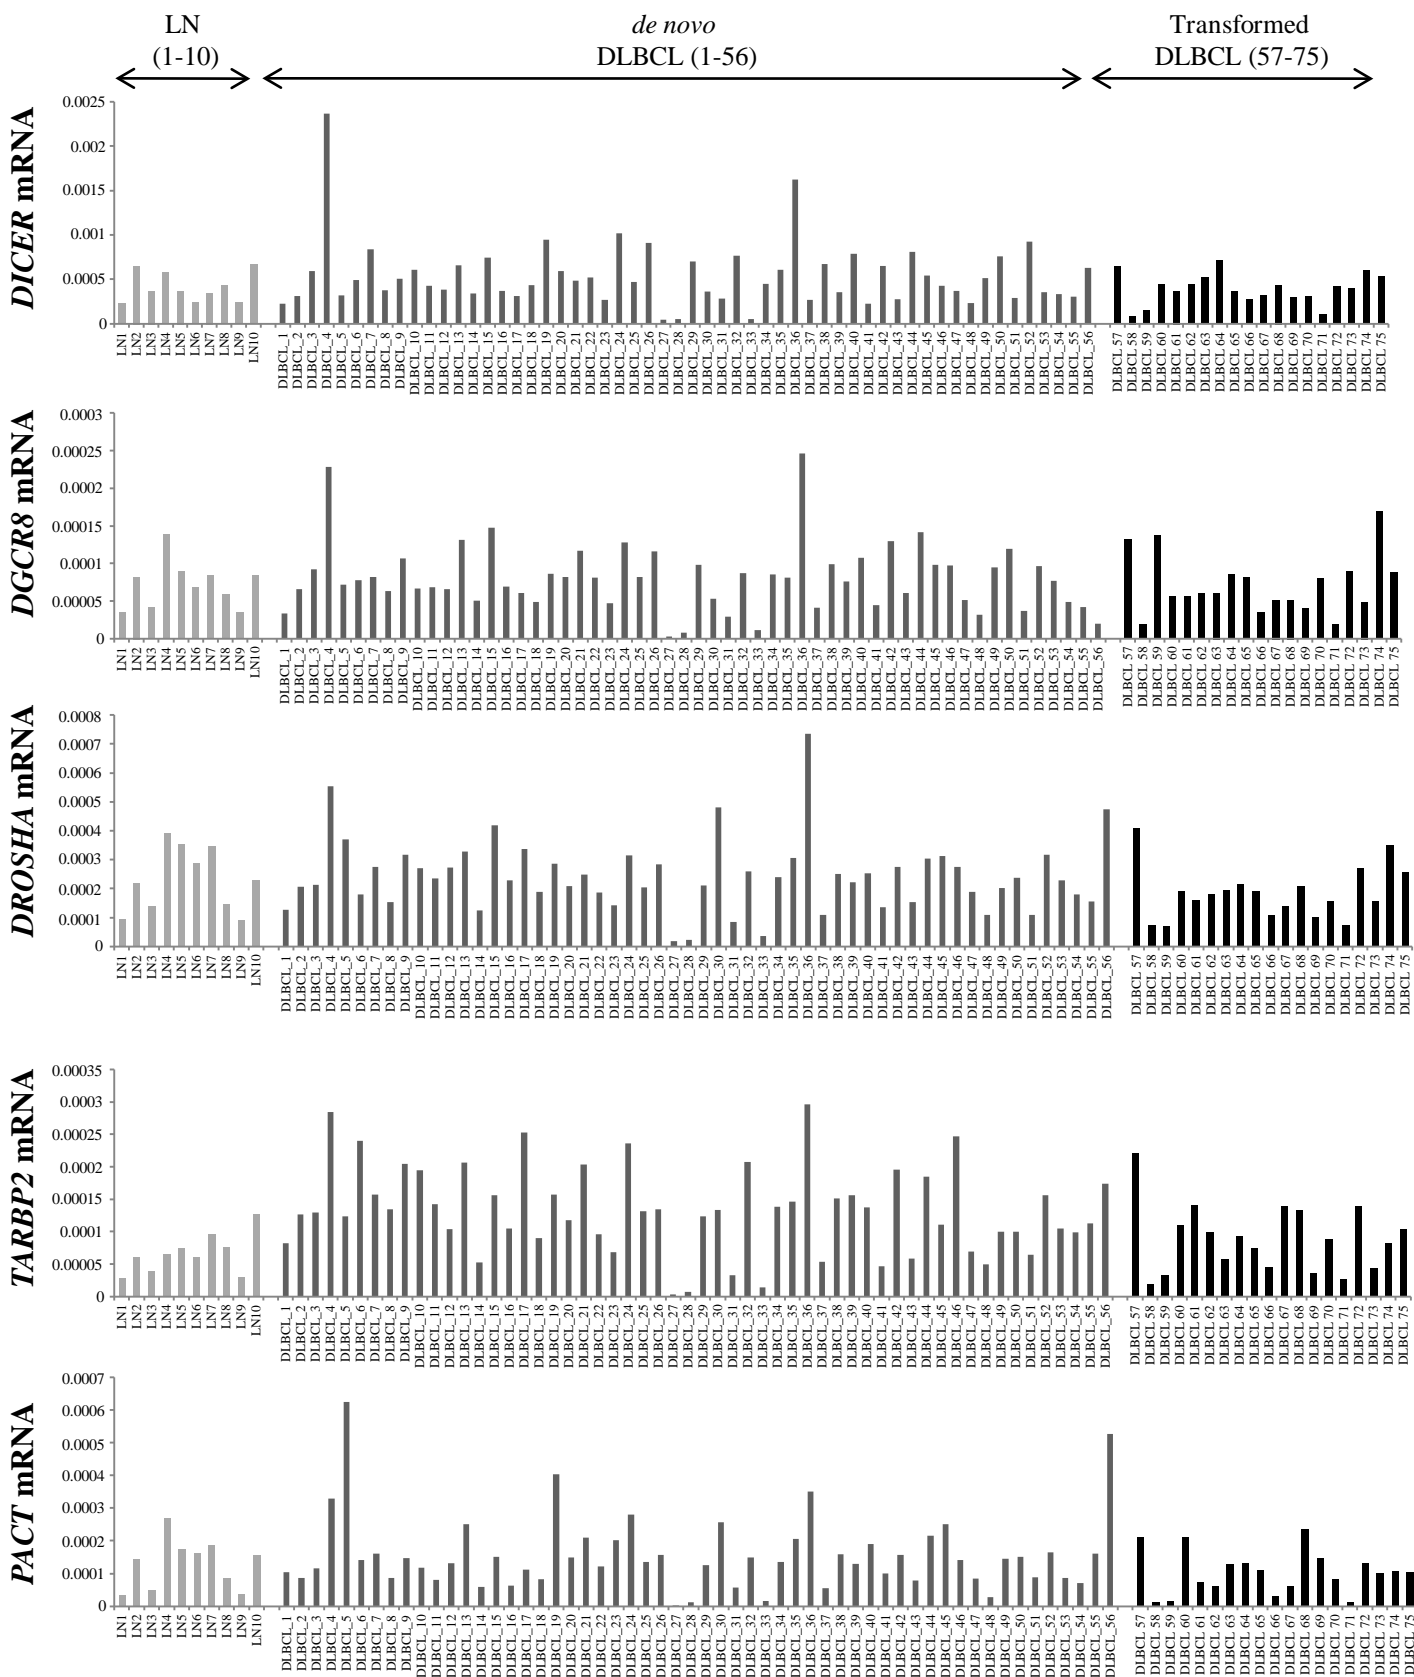

**Figure S3.** Gene expression levels of *DROSHA*, *DICER*, *TARBP2*, *DGCR8* and *PACT* in reactive lymph nodes and DLBCLs (cohort 1). The histograms illustrate the relative mRNA expression levels of each gene in 10 lymph nodes, 56 *de novo* DLBCLs and 19 transformed DLBCLs quantified using RT-qPCR.

**a**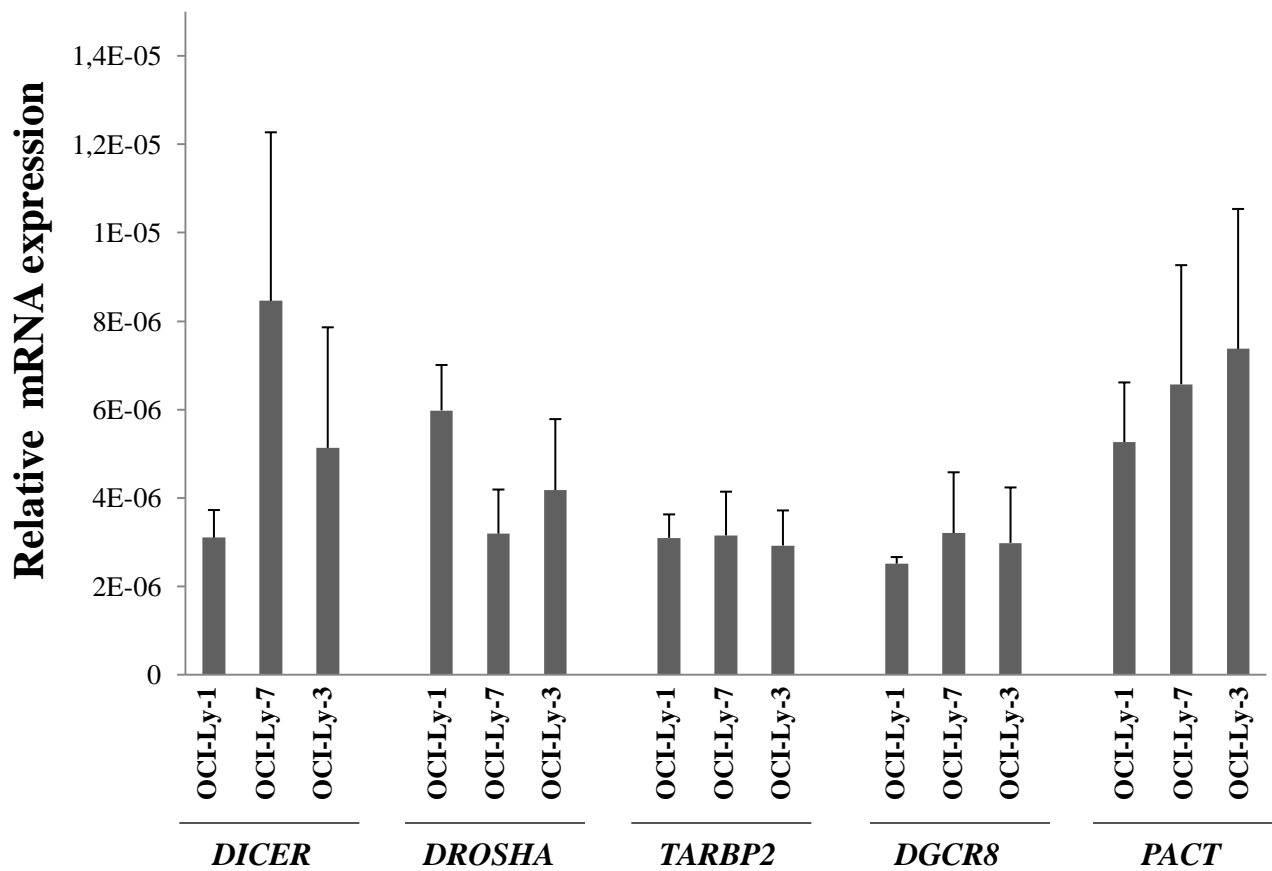**b**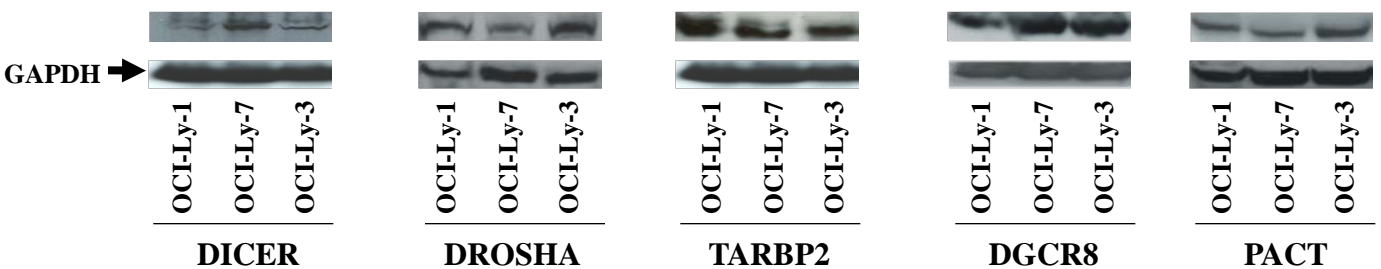

**Figure S4.** Expression levels of *DROSHA*, *DICER*, *TARBP2*, *DGCR8* and *PACT* in DLBCL cell lines. **(a)** The histogram illustrates the relative mRNA expression levels of each gene in three DLBCL cell lines including two GCB-type (OCI-Ly-1 and OCI-Ly-7) and one ABC-type (OCI-Ly-3) analyzed by RT-qPCR. **(b)** Representative Western blots showing protein expression levels of the five miRNA machinery factors analyzed in the three DLBCL cell lines.

**a****IPI Score**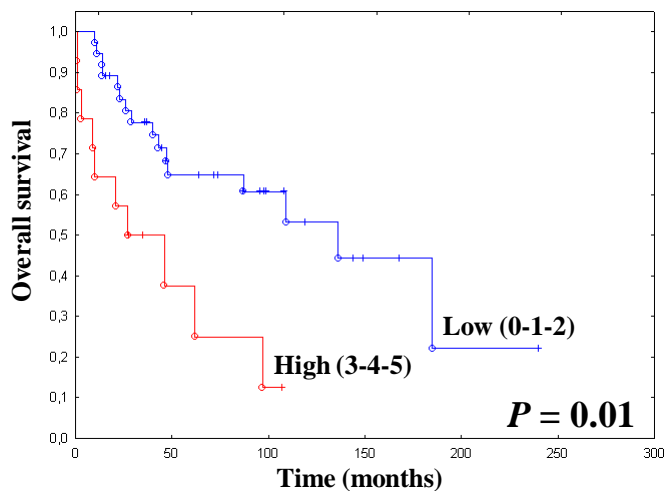**Stage**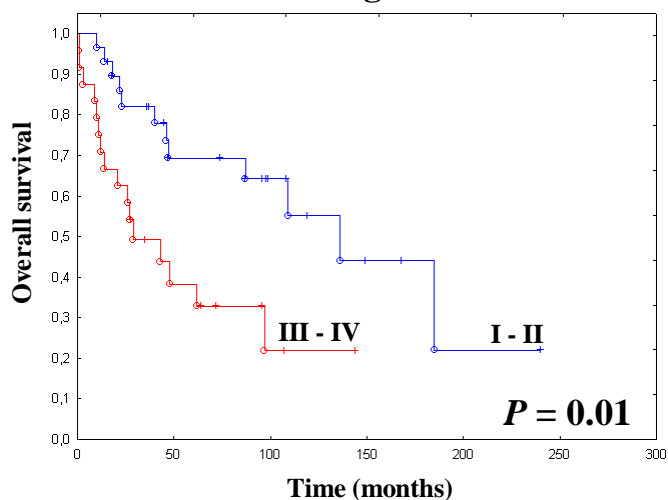**GCB/non-GCB phenotype**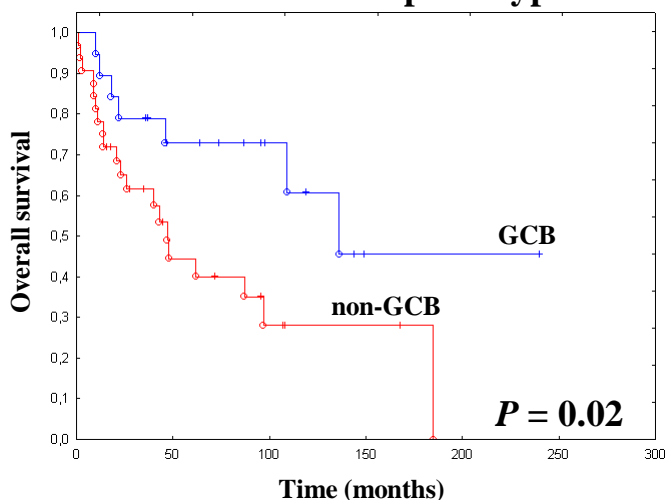**b****IPI Score**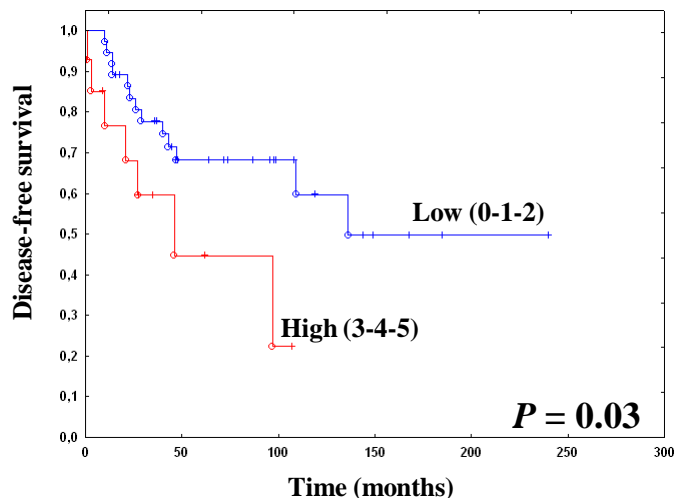**Stage**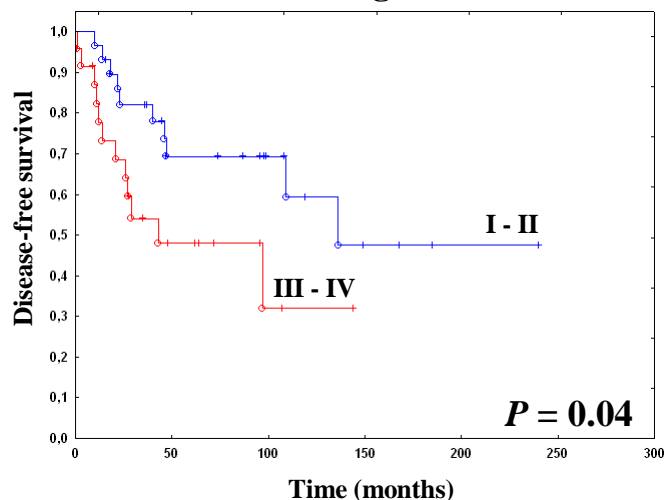

**Figure S5.** Association between clinical parameters and survival among *de novo* DLBCLs (cohort 1). **(a)** Kaplan-Meier plots display significant association between high IPI score, advance tumor stage and non-GCB phenotype with shorter overall survival in *de novo* DLBCL cases. **(b)** Kaplan-Meier plots display significant association between high IPI score and advance tumor stage with shorter disease-free survival in *de novo* DLBCL cases. Differences in survival between groups were calculated using log-rank test.  $P$ -values  $< 0.05$  were considered significant.

**Supplemental Table S1** Clinical and molecular features of the 75 DLBCL tumors studied in the cohort 1

| Case no. | Sex - Age | DLBCL type     | IPI score | stage | GCB type# | Immunohistochemistry* |      |      |      | Treatment                |         | Follow-up     |            |
|----------|-----------|----------------|-----------|-------|-----------|-----------------------|------|------|------|--------------------------|---------|---------------|------------|
|          |           |                |           |       |           | CD10                  | BCL6 | IRF4 | BCL2 | regime                   | outcome | time (months) | outcome    |
| 1        | F-61      | <i>de novo</i> | -         | II    | GCB       | Pos.                  | Pos. | Neg. | Pos. | CHOP x6                  | CR      | 18            | Dead - DOD |
| 2        | M-68      | <i>de novo</i> | 3         | III   | -         | -                     | -    | -    | -    | CHVmP-VB                 | CR      | 27            | Dead - DOD |
| 3        | F-60      | <i>de novo</i> | 3         | II    | GCB       | Pos.                  | Pos. | Pos. | Pos. | CHOP x 8                 | CR      | 46            | Dead - DOD |
| 4        | F-69      | <i>de novo</i> | 1         | I     | non-GCB   | Neg.                  | Neg. | Pos. | Neg. | R-CHOP x 4               | CR      | 40            | Dead - DOD |
| 5        | F-30      | <i>de novo</i> | 2         | IV    | non-GCB   | Neg.                  | Neg. | Neg. | Neg. | VACOP-B                  | CR      | 14            | Dead - DOD |
| 6        | F-67      | <i>de novo</i> | 3         | III   | non-GCB   | Neg.                  | Pos. | Pos. | Pos. | CHOP x 6                 | CR      | 107           | Alive      |
| 7        | M-79      | <i>de novo</i> | 3         | IV    | non-GCB   | Neg.                  | Neg. | Pos. | Pos. | CHOP x 6                 | no CR   | 21            | Dead - DOD |
| 8        | F-90      | <i>de novo</i> | 1         | I     | non-GCB   | Neg.                  | Neg. | Neg. | Neg. | -                        | CR      | 185           | Dead       |
| 9        | M-52      | <i>de novo</i> | 2         | IV    | non-GCB   | Neg.                  | Neg. | Pos. | Pos. | CHOP x 6                 | no CR   | 43            | Dead - DOD |
| 10       | F-67      | <i>de novo</i> | -         | IV    | GCB       | Pos.                  | Pos. | Neg. | Pos. | R-CHOP x 8               | no CR   | 12            | Dead - DOD |
| 11       | F-81      | <i>de novo</i> | 1         | II    | non-GCB   | Neg.                  | Neg. | Pos. | Pos. | Palliative chemotherapy  | no CR   | 14            | Dead - DOD |
| 12       | M-77      | <i>de novo</i> | 1         | II    | GCB       | Pos.                  | Pos. | Pos. | Neg. | R-CHOP x 4               | CR      | 136           | Dead - DOD |
| 13       | M-72      | <i>de novo</i> | 4         | IV    | non-GCB   | Neg.                  | Neg. | Pos. | Pos. | CHOP                     | no CR   | 3             | Dead - DOD |
| 14       | M-50      | <i>de novo</i> | 2         | III   | non-GCB   | Neg.                  | Neg. | Pos. | Pos. | CHOP x 7                 | CR      | 26            | Dead - DOD |
| 15       | F-79      | <i>de novo</i> | 4         | IV    | non-GCB   | Neg.                  | Neg. | Pos. | Neg. | CHOP x 6                 | CR      | 62            | Dead       |
| 16       | M-42      | <i>de novo</i> | 0         | I     | GCB       | Pos.                  | Neg. | Neg. | Pos. | R-CHOP x 3               | CR      | 149           | Alive      |
| 17       | F-79      | <i>de novo</i> | 2         | III   | non-GCB   | Neg.                  | Neg. | Neg. | Pos. | CHOP x 6                 | CR      | 48            | Dead       |
| 18       | M-78      | <i>de novo</i> | 4         | IV    | non-GCB   | Neg.                  | Neg. | Neg. | Pos. | -                        | -       | 9             | Dead       |
| 19       | M-47      | <i>de novo</i> | 1         | II    | GCB       | Pos.                  | Pos. | Pos. | Pos. | CHOP x 8                 | CR      | 109           | Dead - DOD |
| 20       | F-71      | <i>de novo</i> | 3         | III   | non-GCB   | Neg.                  | Neg. | Neg. | Pos. | CHOP x 8                 | CR      | 10            | Dead - DOD |
| 21       | M-31      | <i>de novo</i> | 1         | II    | GCB       | Pos.                  | Pos. | Pos. | Pos. | Other CT                 | CR      | 119           | Alive      |
| 22       | M-68      | <i>de novo</i> | 5         | IV    | non-GCB   | Neg.                  | Pos. | Pos. | Neg. | CHOP x 9                 | CR      | 97            | Dead - DOD |
| 23       | F-70      | <i>de novo</i> | 1         | II    | GCB       | Pos.                  | Neg. | Pos. | Pos. | CHOP x 8                 | CR      | 240           | Alive      |
| 24       | F-49      | <i>de novo</i> | 0         | I     | GCB       | Pos.                  | Pos. | Pos. | Neg. | CHOP x 3                 | CR      | 99            | Alive      |
| 25       | M-50      | <i>de novo</i> | 1         | I     | non-GCB   | Neg.                  | Neg. | Neg. | Pos. | op                       | CR      | 47            | Dead - DOD |
| 26       | M-64      | <i>de novo</i> | 1         | II    | GCB       | Pos.                  | Neg. | Neg. | Pos. | CHOP x 6                 | CR      | 96            | Alive      |
| 27       | M-69      | <i>de novo</i> | 2         | III   | non-GCB   | Neg.                  | Neg. | Neg. | Pos. | CHOP x 5                 | no CR   | 11            | Dead - DOD |
| 28       | F-44      | <i>de novo</i> | 1         | III   | GCB       | Pos.                  | Pos. | Pos. | Pos. | VACOP-B                  | CR      | 144           | Alive      |
| 29       | F-68      | <i>de novo</i> | 1         | II    | non-GCB   | Neg.                  | Neg. | Neg. | Pos. | CHOP x6                  | CR      | 96            | Alive      |
| 30       | M-68      | <i>de novo</i> | 1         | I     | GCB       | Pos.                  | Pos. | Neg. | Neg. | -                        | CR      | 98            | Alive      |
| 31       | M-25      | <i>de novo</i> | 2         | III   | -         | -                     | Neg. | Neg. | Neg. | VACOP-B                  | CR      | 29            | Dead - DOD |
| 32       | M-74      | <i>de novo</i> | 4         | IV    | non-GCB   | Neg.                  | Neg. | Pos. | Pos. | CHOP x1                  | no CR   | 1             | Dead - DOD |
| 33       | F-77      | <i>de novo</i> | -         | -     | non-GCB   | Neg.                  | Neg. | Pos. | Pos. | -                        | -       | 4             | Dead       |
| 34       | M-78      | <i>de novo</i> | 4         | IV    | non-GCB   | Neg.                  | Pos. | Pos. | Pos. | no treatment             | no CR   | 1             | Dead       |
| 35       | F-83      | <i>de novo</i> | 1         | I     | GCB       | Pos.                  | Neg. | Neg. | Neg. | op                       | CR      | 22            | Dead - DOD |
| 36       | M-65      | <i>de novo</i> | 1         | I     | non-GCB   | Neg.                  | Pos. | Pos. | Neg. | -                        | -       | 16            | Dead       |
| 37       | F-78      | <i>de novo</i> | 1         | I     | non-GCB   | Neg.                  | Neg. | Pos. | Neg. | -                        | -       | 87            | Dead       |
| 38       | M-66      | <i>de novo</i> | -         | -     | non-GCB   | Neg.                  | Neg. | Pos. | Neg. | -                        | -       | 9             | Dead       |
| 39       | F-79      | <i>de novo</i> | 1         | II    | GCB       | Pos.                  | Pos. | Pos. | Pos. | R-CHOP-14 x 6            | CR      | 36            | Alive      |
| 40       | F-80      | <i>de novo</i> | 3         | IV    | non-GCB   | Neg.                  | Pos. | Pos. | Pos. | R-CHOP-14 x 6            | CR      | 28            | Alive      |
| 41       | M-78      | <i>de novo</i> | 1         | I     | GCB       | Pos.                  | Pos. | Neg. | Pos. | R-CHOP-21 x 6            | CR      | 47            | Alive      |
| 42       | M-75      | <i>de novo</i> | 2         | IV    | non-GCB   | Neg.                  | Neg. | Pos. | Pos. | CHOP x 8                 | CR      | 72            | Alive      |
| 43       | M-70      | <i>de novo</i> | 1         | II    | non-GCB   | Neg.                  | Neg. | Pos. | Pos. | CHOP x 6                 | CR      | 108           | Alive      |
| 44       | M-72      | <i>de novo</i> | 4         | III   | non-GCB   | Neg.                  | Neg. | Pos. | Neg. | R-CHOP 14 x 6            | CR      | 35            | Alive      |
| 45       | F-73      | <i>de novo</i> | 1         | II    | GCB       | Pos.                  | Pos. | Neg. | Pos. | R-CHOP-21 x 6            | CR      | 10            | Dead - DOD |
| 46       | F-69      | <i>de novo</i> | 3         | IV    | GCB       | Pos.                  | -    | -    | Pos. | R-CHOP-14 x 6            | CR      | 64            | Alive      |
| 47       | M-64      | <i>de novo</i> | -         | -     | non-GCB   | Neg.                  | Neg. | Neg. | Pos. | -                        | -       | 2             | Dead       |
| 48       | M-69      | <i>de novo</i> | 4         | IV    | non-GCB   | Neg.                  | Pos. | Pos. | Pos. | R-CHOP-14 x 6            | CR      | 28            | Alive      |
| 49       | F-63      | <i>de novo</i> | 1         | I     | GCB       | Pos.                  | Pos. | Neg. | Neg. | CHOP x 4                 | CR      | 87            | Alive      |
| 50       | M-63      | <i>de novo</i> | 2         | I     | non-GCB   | Neg.                  | Neg. | Neg. | Pos. | R-CHOP-14 x 6            | CR      | 45            | Alive      |
| 51       | F-61      | <i>de novo</i> | 2         | II    | non-GCB   | Neg.                  | Pos. | Pos. | Pos. | R-CHOP-14 x 6            | CR      | 23            | Dead - DOD |
| 52       | M-52      | <i>de novo</i> | 0         | II    | non-GCB   | Neg.                  | Neg. | Neg. | Neg. | CHOP x 4 + RT            | CR      | 168           | Alive      |
| 53       | F-52      | <i>de novo</i> | 1         | III   | non-GCB   | Neg.                  | Pos. | Pos. | Neg. | R-CHOEP x 6              | CR      | 96            | Alive      |
| 54       | M-49      | <i>de novo</i> | 0         | II    | GCB       | Pos.                  | Pos. | Neg. | Pos. | R-CHOP-14 x 6            | CR      | 37            | Alive      |
| 55       | M-48      | <i>de novo</i> | 1         | II    | non-GCB   | Neg.                  | Pos. | Pos. | Pos. | R-CHOP-14 x 6            | CR      | 18            | Alive      |
| 56       | M-17      | <i>de novo</i> | 0         | I     | GCB       | Pos.                  | Pos. | Pos. | Neg. | R-CHOP-21 x 6            | CR      | 74            | Alive      |
| 57       | M-49      | Transformed    | 1         | III   | GCB       | Pos.                  | Pos. | Neg. | Neg. | -                        | CR      | -             | -          |
| 58       | F-68      | Transformed    | 3         | III   | non-GCB   | Neg.                  | Neg. | Neg. | Neg. | CHOP x 8                 | CR      | -             | -          |
| 59       | F-74      | Transformed    | 1         | II    | non-GCB   | Neg.                  | Neg. | Neg. | Pos. | CHOP x 8                 | CR      | -             | -          |
| 60       | F-47      | Transformed    | 2         | IV    | GCB       | Pos.                  | Pos. | Neg. | Pos. | CHOP x 6                 | no CR   | -             | -          |
| 61       | M-76      | Transformed    | 2         | IV    | GCB       | Pos.                  | Neg. | Neg. | Pos. | CHOP x 5                 | no CR   | -             | -          |
| 62       | M-66      | Transformed    | 3         | IV    | GCB       | Pos.                  | Neg. | Neg. | Pos. | CHOP x 9                 | no CR   | -             | -          |
| 63       | F-33      | Transformed    | 2         | III   | GCB       | Pos.                  | Pos. | Neg. | Pos. | CHOP x 5                 | CR      | -             | -          |
| 64       | F-68      | Transformed    | 2         | IV    | non-GCB   | Neg.                  | Neg. | Pos. | -    | R-CHOP-14 x 6            | CR      | -             | -          |
| 65       | M-79      | Transformed    | 5         | IV    | GCB       | Pos.                  | Pos. | Neg. | -    | CHOP x 1                 | no CR   | -             | -          |
| 66       | F-63      | Transformed    | 1         | II    | GCB       | Pos.                  | Pos. | Neg. | -    | R-CHOP x 6               | CR      | -             | -          |
| 67       | F-55      | Transformed    | 2         | III   | -         | -                     | -    | -    | -    | R-CHOP-14 x 6            | CR      | -             | -          |
| 68       | M-53      | Transformed    | 3         | IV    | GCB       | Pos.                  | Pos. | Pos. | -    | R-CHOP-14 x 6            | CR      | -             | -          |
| 69       | M-75      | Transformed    | 2         | III   | GCB       | Pos.                  | Pos. | Neg. | -    | R-CHOP-14 x 6, R-ICE x 3 | no CR   | -             | -          |
| 70       | M-70      | Transformed    | 3         | III   | GCB       | Pos.                  | Pos. | Neg. | -    | R-ICE x 6                | CR      | -             | -          |
| 71       | M-66      | Transformed    | 1         | II    | GCB       | Pos.                  | Pos. | Pos. | -    | R-ICE x 5 + HDTC         | CR      | -             | -          |
| 72       | M-58      | Transformed    | 1         | I     | GCB       | Pos.                  | Pos. | Pos. | -    | RT                       | no CR   | -             | -          |
| 73       | F-83      | Transformed    | 3         | IV    | GCB       | Pos.                  | Pos. | Pos. | -    | CVIP + RT                | no CR   | -             | -          |
| 74       | M-61      | Transformed    | 1         | II    | -         | -                     | -    | -    | -    | R-CHOP-14 x 6            | CR      | -             | -          |
| 75       | F-63      | Transformed    | 1         | II    | -         | -                     | -    | -    | -    | R-CHOP-21 x 6            | CR      | -             | -          |

# GCB and non-GCB subtypes were classified based on the algorithm of Hans et al., 2004 (ref. 28);

\*Immunohistochemistry results have been partly published in Berglund et al., 2005 (ref. 3);

F=female; M=male; GCB=Germinal center B-cell; Pos=positive; Neg=negative;

CHOP=Cyclophosphamide, Doxorubicin, Oncovin and Prednisone; R-CHOP=CHOP+Rituximab;

CHVmP-VB=Cyclophosphamide, Doxorubicin, Teniposide, Prednisone, Vincristine and Bleomycin; CT=chemotherapy; op=operation;

VACOP-B=Etoposide, Doxorubicin, Cyclophosphamide, Vincristine, Prednisone and Bleomycin; RT=Radiotherapy; CHOEP=CHOP+Etoposide;

R-ICE=Rituximab, Ifosfamide, Carboplatin and Etoposide; HDTC=high dose chemotherapy followed by autologous stem cell transplantation;

CVIP=Cyclophosphamide, Oncovin, Idarubicin and Prednisone;

CR=complete response; no CR=no complete response; DOD=dead of disease

**Supplemental Table S2** Clinical and molecular features of the 47 DLBCL tumors studied in the cohort 2

| Case no. | Sex - Age | DLBCL type  | IPI score | stage | GCB type# | Immunohistochemistry* |        |      |      | regime                            | Treatment | outcome | Follow-up     |         |
|----------|-----------|-------------|-----------|-------|-----------|-----------------------|--------|------|------|-----------------------------------|-----------|---------|---------------|---------|
|          |           |             |           |       |           | CD10                  | BCL6   | IRF4 | BCL2 |                                   |           |         | time (months) | outcome |
| 1        | M-57      | de novo     | 0         | II    | non-GCB   | Neg                   | pos    | pos  | neg  | CHOP x 8                          | CR        | 5       | Alive         |         |
| 2        | M-84      | de novo     | 2         | III   | non-GCB   | neg                   | neg    | pos  | -    | no treatment                      | -         | 5       | Dead - DOD    |         |
| 3        | M-84      | de novo     | 2         | III   | non-GCB   | neg                   | neg    | pos  | -    | no treatment                      | -         | 5       | Dead - DOD    |         |
| 4        | M-48      | de novo     | 1         | I     | GCB       | Neg                   | w. pos | neg  | -    | CHOP-R x 6                        | CR        | 14      | Alive         |         |
| 5        | M-62      | de novo     | 1         | II    | GCB       | pos                   | neg    | neg  | neg  | CHOP x 6                          | CR        | 51      | Alive         |         |
| 6        | M-79      | de novo     | 3         | II    | GCB       | neg                   | pos    | neg  | -    | RT                                | -         | 3       | Dead - DOD    |         |
| 7        | M-60      | de novo     | 2         | I     | non-GCB   | neg                   | neg    | pos  | pos  | CNOP-R x 6                        | -         | 5       | Dead - DOD    |         |
| 8        | F-62      | de novo     | 3         | II    | GCB       | pos                   | pos    | pos  | -    | CHOP-R                            | no CR     | 41      | Alive         |         |
| 9        | F-77      | de novo     | 3         | I     | non-GCB   | neg                   | neg    | neg  | pos  | CNOP x 6                          | no CR     | 34      | Alive         |         |
| 10       | M-61      | de novo     | 1         | I     | non-GCB   | neg                   | neg    | pos  | -    | CHOP-R x 6 + MTX x 1 + RT         | CR        | 29      | Alive         |         |
| 11       | M-74      | de novo     | 1         | I     | GCB       | neg                   | pos    | neg  | -    | CHOP-R x 4 + IFRT                 | CR        | 36      | Alive         |         |
| 12       | F-59      | de novo     | 0         | I     | GCB       | neg                   | pos    | neg  | neg  | CHOP-R x 4 + RT                   | CR        | 27      | Alive         |         |
| 13       | M-39      | de novo     | 0         | I     | GCB       | pos                   | neg    | pos  | pos  | A-EPOCH-R x 4                     | no CR     | 15      | Alive         |         |
| 14       | M-63      | de novo     | 1         | I     | non-GCB   | neg                   | neg    | pos  | pos  | CHOP-R                            | CR        | 14      | Alive         |         |
| 15       | -         | de novo     | -         | -     | GCB       | pos                   | pos    | pos  | -    | -                                 | -         | -       | -             |         |
| 16       | F-84      | de novo     | 1         | I     | non-GCB   | neg                   | pos    | pos  | -    | PMitCEBO-R x 6                    | CR        | 24      | Alive         |         |
| 17       | F-81      | de novo     | 2         | II    | -         | -                     | -      | -    | -    | PMitCEBO x 6                      | -         | 5       | Dead          |         |
| 18       | F-80      | de novo     | 1         | I     | non-GCB   | neg                   | pos    | pos  | -    | CHOP-R x 6                        | -         | 16      | Dead - DOD    |         |
| 19       | M-44      | de novo     | 1         | I     | non-GCB   | neg                   | neg    | neg  | pos  | CODOX-M / IVAC                    | CR        | 45      | Alive         |         |
| 20       | F-67      | de novo     | 3         | IV    | GCB       | pos                   | pos    | neg  | -    | CHOP-R x 6                        | CR        | 46      | Alive         |         |
| 21       | F-62      | de novo     | 4         | III   | GCB       | pos                   | pos    | neg  | -    | CODOX-M / IVAC                    | no CR     | 36      | Alive         |         |
| 22       | M-56      | de novo     | 2         | IV    | GCB       | neg                   | neg    | neg  | pos  | CHOP-R x 8                        | CR        | 19      | Alive         |         |
| 23       | F-10      | de novo     | 2         | I     | non-GCB   | neg                   | neg    | pos  | -    | CHOP-R x 6                        | CR        | 33      | Alive         |         |
| 24       | F-71      | de novo     | 4         | III   | GCB       | pos                   | pos    | neg  | neg  | CHOP-R                            | no CR     | 7       | Dead - DOD    |         |
| 25       | F-64      | de novo     | 2         | III   | GCB       | pos                   | pos    | pos  | -    | CHOP-R x 6                        | CR        | 21      | Alive         |         |
| 26       | M-38      | de novo     | 1         | I     | GCB       | pos                   | pos    | neg  | neg  | CODOX-M + RT                      | no CR     | 11      | Alive         |         |
| 27       | M-48      | de novo     | 4         | IV    | non-GCB   | neg                   | neg    | pos  | -    | CHOP-R-14 x 8                     | CR        | 21      | Alive         |         |
| 28       | M-83      | de novo     | -         | -     | -         | -                     | -      | -    | -    | -                                 | -         | -       | -             |         |
| 29       | M-62      | de novo     | 1         | II    | GCB       | pos                   | neg    | neg  | neg  | CHOP x 6                          | CR        | 51      | Alive         |         |
| 30       | M-75      | de novo     | 2         | III   | -         | -                     | -      | -    | -    | no treatment                      | -         | 2       | Dead - DOD    |         |
| 31       | M-66      | de novo     | 3         | II    | GCB       | pos                   | pos    | neg  | pos  | CHOP x 8                          | -         | 43      | Alive         |         |
| 32       | M-75      | de novo     | 4         | III   | non-GCB   | neg                   | neg    | pos  | pos  | no treatment                      | -         | 1       | Dead - DOD    |         |
| 33       | F-84      | de novo     | 1         | I     | non-GCB   | neg                   | pos    | pos  | neg  | no treatment                      | -         | 60      | Alive         |         |
| 34       | M-65      | de novo     | 1         | I     | non-GCB   | neg                   | neg    | pos  | neg  | CHOP-R x 4 IFRT                   | -         | 29      | Alive         |         |
| 35       | F-75      | de novo     | 2         | III   | GCB       | neg                   | pos    | neg  | pos  | CHOP-R x 6                        | CR        | 27      | Alive         |         |
| 36       | M-58      | de novo     | 1         | III   | non-GCB   | neg                   | pos    | pos  | pos  | CHOP-R x 6                        | CR        | 9       | Alive         |         |
| 37       | M-59      | de novo     | 0         | I     | non-GCB   | neg                   | pos    | pos  | pos  | CHOP x 6                          | -         | 50      | -             |         |
| 38       | M-57      | de novo     | 0         | I     | GCB       | pos                   | pos    | neg  | neg  | CHOP-R x 6                        | CR        | 34      | Alive         |         |
| 39       | M-54      | Transformed | 1         | IV    | non-GCB   | neg                   | pos    | pos  | pos  | CHOP                              | -         | 1       | Dead - DOD    |         |
| 40       | F-51      | Transformed | 1         | II    | GCB       | Pos                   | neg    | pos  | neg  | CHOP x 6                          | -         | 4       | Alive         |         |
| 41       | M-66      | Transformed | 3         | IV    | non-GCB   | Neg                   | pos    | pos  | -    | CHOP x 4                          | -         | 3       | Dead - DOD    |         |
| 42       | F-69      | Transformed | 2         | III   | GCB       | neg                   | pos    | neg  | -    | CHOP-R x 8                        | no CR     | 30      | Alive         |         |
| 43       | M-80      | Transformed | -         | -     | non-GCB   | neg                   | neg    | pos  | -    | CHOP-R x 6                        | CR        | -       | -             |         |
| 44       | F-91      | Transformed | -         | I     | GCB       | pos                   | pos    | neg  | -    | RT                                | -         | -       | -             |         |
| 45       | M-70      | Transformed | 3         | III   | GCB       | pos                   | neg    | neg  | -    | RT                                | no CR     | -       | Alive         |         |
| 46       | M-71      | Transformed | 1         | I     | non-GCB   | neg                   | pos    | pos  | -    | CHOP-R x 6 + RT x 4 + adjuvant RT | CR        | 33      | Alive         |         |
| 47       | M-64      | Transformed | -         | -     | GCB       | pos                   | pos    | neg  | pos  | CHOP-R                            | -         | 6       | Dead - DOD    |         |

\*GCB and non-GCB subtypes were classified based on the algorithm of Hans et al., 2004 (ref. 28);

\*Immunohistochemistry results have been partly published in Lawrie et al., 2007 (ref. 13) and 2009 (ref. 14);

F=female; M=male; GCB=Germinal center B-cell; Pos=positive; Neg=negative;

CHOP=Cyclophosphamide, Doxorubicin, Oncovin and Prednisone; R=Rituximab;

RT=Radiotherapy; CNOP=Cyclophosphamide, Novantrone, Oncovin and Prednisone; MTX=Methotrexate;

IFRT=involved field RT; A-EPOCH=Doxorubicin, Etoposide, Prednisone, Oncovin and Cyclophosphamide;

PMitCEBO=Prednisolone, Mitoxantrone, Cyclophosphamide, Etoposide, Bleomycin and Oncovin;

CODOX-M / IVAC=Cyclophosphamide, Oncovin and Doxorubicin - Methotrexate / Isosfamide, Etoposide and high dose of Cytarabine;

CR=complete response; no CR=no complete response; DOD=dead of disease



**Supplemental Table S3** Array-based SAM results for deregulated miRNAs in DLBCLs as compared to lymph nodes (LNs)

| miRNA                                       | Score (d) | q-value (%) |
|---------------------------------------------|-----------|-------------|
| <b>All DLBCLs vs. LNs</b>                   |           |             |
| <i>Over-expressed miRNAs in all DLBCLs</i>  |           |             |
| <i>miR-21</i>                               | 3.83      | 0           |
| <i>miR-494</i>                              | 1.95      | 9.42        |
| <i>miR-155</i>                              | 1.94      | 9.42        |
| <i>miR-34a</i>                              | 1.89      | 9.42        |
| <i>miR-638</i>                              | 1.77      | 16.14       |
| <i>miR-20a</i>                              | 1.61      | 16.14       |
| <i>miR-19b</i>                              | 1.55      | 17.26       |
| <i>miR-19a</i>                              | 1.49      | 17.26       |
| <i>miR-22</i>                               | 1.48      | 17.26       |
| <i>miR-663</i>                              | 1.47      | 17.26       |
| <i>miR-106a</i>                             | 1.46      | 17.26       |
| <i>miR-92</i>                               | 1.45      | 17.26       |
| <i>miR-324-3p</i>                           | 1.43      | 17.26       |
| <i>miR-801</i>                              | 1.36      | 17.26       |
| <i>Under-expressed miRNAs in all DLBCLs</i> |           |             |
| <i>miR-150</i>                              | - 10.16   | 0           |
| <i>let-7g</i>                               | - 9.04    | 0           |
| <i>miR-26a</i>                              | - 7.56    | 0           |
| <i>miR-26b</i>                              | - 5.39    | 0           |
| <i>miR-30e-5p</i>                           | - 5.12    | 0           |
| <i>miR-145</i>                              | - 4.46    | 0           |
| <i>miR-29c</i>                              | - 4.37    | 0           |
| <i>miR-126</i>                              | - 4.30    | 0           |
| <i>miR-101</i>                              | - 3.93    | 0           |
| <i>miR-29a</i>                              | - 3.82    | 0           |
| <i>miR-125a</i>                             | - 3.51    | 0           |
| <i>miR-195</i>                              | - 3.33    | 0           |
| <i>let-7f</i>                               | - 3.12    | 0           |
| <i>miR-143</i>                              | - 3.06    | 0           |
| <i>miR-142-3p</i>                           | - 2.87    | 0           |
| <i>miR-768-3p</i>                           | - 2.87    | 0           |
| <i>miR-126*</i>                             | - 2.84    | 0           |
| <i>miR-342</i>                              | - 2.82    | 0           |
| <i>let-7a</i>                               | - 2.78    | 0           |
| <i>miR-10b</i>                              | - 2.74    | 0           |
| <i>let-7e</i>                               | - 2.71    | 0           |
| <i>miR-29b</i>                              | - 2.68    | 0           |
| <i>miR-142-5p</i>                           | - 2.66    | 0           |
| <i>miR-146b</i>                             | - 2.62    | 0           |

|                   |        |       |
|-------------------|--------|-------|
| <i>miR-497</i>    | - 2.23 | 0     |
| <i>miR-10a</i>    | - 1.99 | 2.42  |
| <i>miR-30a-5p</i> | - 1.98 | 2.42  |
| <i>let-7d</i>     | - 1.94 | 2.42  |
| <i>let-7c</i>     | - 1.70 | 6.56  |
| <i>miR-374</i>    | - 1.70 | 6.56  |
| <i>miR-23b</i>    | - 1.52 | 10.27 |
| <i>miR-223</i>    | - 1.49 | 10.27 |
| <i>miR-23a</i>    | - 1.30 | 16.14 |
| <i>let-7i</i>     | - 1.24 | 16.14 |
| <i>miR-186</i>    | - 1.24 | 16.14 |
| <i>miR-199a*</i>  | - 1.21 | 16.14 |
| <i>miR-199a</i>   | - 1.20 | 16.14 |
| <i>miR-125b</i>   | - 1.17 | 16.14 |
| <i>miR-130a</i>   | - 1.11 | 19.16 |
| <i>miR-191</i>    | - 1.11 | 19.16 |
| <i>miR-99a</i>    | - 1.10 | 19.16 |

### ***De novo* DLBCLs vs. LNs**

#### *Over-expressed miRNAs in de novo DLBCLs*

|                   |      |       |
|-------------------|------|-------|
| <i>miR-21</i>     | 3.46 | 0     |
| <i>miR-155</i>    | 2.56 | 1.75  |
| <i>miR-494</i>    | 2.23 | 4.40  |
| <i>miR-34a</i>    | 2.17 | 4.40  |
| <i>miR-22</i>     | 1.80 | 9.23  |
| <i>miR-324-3p</i> | 1.73 | 9.23  |
| <i>miR-20a</i>    | 1.68 | 9.23  |
| <i>miR-19b</i>    | 1.65 | 9.23  |
| <i>miR-638</i>    | 1.63 | 9.23  |
| <i>miR-19a</i>    | 1.62 | 9.23  |
| <i>miR-663</i>    | 1.50 | 13.81 |
| <i>miR-106a</i>   | 1.50 | 13.81 |
| <i>miR-92</i>     | 1.48 | 13.81 |
| <i>miR-146a</i>   | 1.41 | 13.81 |
| <i>miR-574</i>    | 1.38 | 13.81 |

#### *Under-expressed miRNAs in de novo DLBCLs*

|                   |        |   |
|-------------------|--------|---|
| <i>miR-150</i>    | - 9.36 | 0 |
| <i>let-7g</i>     | - 8.71 | 0 |
| <i>miR-26a</i>    | - 7.16 | 0 |
| <i>miR-30e-5p</i> | - 5.82 | 0 |
| <i>miR-26b</i>    | - 5.43 | 0 |
| <i>miR-126</i>    | - 4.87 | 0 |
| <i>miR-145</i>    | - 4.71 | 0 |
| <i>miR-101</i>    | - 3.98 | 0 |
| <i>miR-29c</i>    | - 3.72 | 0 |
| <i>miR-29a</i>    | - 3.59 | 0 |
| <i>miR-195</i>    | - 3.47 | 0 |

|                   |        |       |
|-------------------|--------|-------|
| <i>miR-126*</i>   | - 3.44 | 0     |
| <i>miR-125a</i>   | - 3.33 | 0     |
| <i>miR-342</i>    | - 3.29 | 0     |
| <i>miR-10b</i>    | - 3.11 | 0     |
| <i>miR-768-3p</i> | - 3.07 | 0     |
| <i>miR-143</i>    | - 2.99 | 0     |
| <i>miR-142-3p</i> | - 2.75 | 0     |
| <i>let-7e</i>     | - 2.69 | 0     |
| <i>let-7f</i>     | - 2.65 | 0     |
| <i>let-7c</i>     | - 2.62 | 0     |
| <i>let-7a</i>     | - 2.45 | 0     |
| <i>miR-146b</i>   | - 2.37 | 0     |
| <i>miR-199a*</i>  | - 2.14 | 0     |
| <i>miR-142-5p</i> | - 2.06 | 2.09  |
| <i>miR-30a-5p</i> | - 2.01 | 2.09  |
| <i>miR-125b</i>   | - 1.99 | 2.09  |
| <i>miR-29b</i>    | - 1.93 | 2.09  |
| <i>miR-10a</i>    | - 1.93 | 2.09  |
| <i>miR-23b</i>    | - 1.80 | 3.29  |
| <i>let-7d</i>     | - 1.76 | 3.29  |
| <i>miR-100</i>    | - 1.69 | 4.65  |
| <i>miR-223</i>    | - 1.68 | 4.65  |
| <i>miR-374</i>    | - 1.53 | 5.71  |
| <i>miR-497</i>    | - 1.46 | 8.14  |
| <i>miR-140</i>    | - 1.41 | 8.14  |
| <i>miR-199a</i>   | - 1.33 | 10.58 |
| <i>miR-23a</i>    | - 1.15 | 14.10 |
| <i>miR-186</i>    | - 1.13 | 14.10 |
| <i>miR-191</i>    | - 1.12 | 14.10 |
| <i>miR-130a</i>   | - 0.98 | 18.40 |

### **Transformed DLBCLs vs. LNs**

#### *Over-expressed miRNAs in transformed DLBCLs*

|                 |      |       |
|-----------------|------|-------|
| <i>miR-21</i>   | 4.55 | 0     |
| <i>miR-509</i>  | 3.46 | 0     |
| <i>miR-638</i>  | 3.17 | 0     |
| <i>miR-663</i>  | 3.09 | 0     |
| <i>miR-370</i>  | 2.30 | 1.69  |
| <i>miR-422b</i> | 2.00 | 7.73  |
| <i>miR-801</i>  | 1.99 | 7.73  |
| <i>miR-630</i>  | 1.77 | 17.25 |

#### *Under-expressed miRNAs in transformed DLBCLs*

|                   |        |   |
|-------------------|--------|---|
| <i>let-7g</i>     | - 7.54 | 0 |
| <i>miR-26a</i>    | - 7.07 | 0 |
| <i>miR-150</i>    | - 6.71 | 0 |
| <i>miR-26b</i>    | - 5.90 | 0 |
| <i>miR-30e-5p</i> | - 4.56 | 0 |

|                   |        |       |
|-------------------|--------|-------|
| <i>miR-101</i>    | - 4.33 | 0     |
| <i>miR-29a</i>    | - 4.15 | 0     |
| <i>miR-142-5p</i> | - 4.15 | 0     |
| <i>miR-29b</i>    | - 4.07 | 0     |
| <i>let-7f</i>     | - 3.64 | 0     |
| <i>miR-125a</i>   | - 3.50 | 0     |
| <i>miR-146b</i>   | - 3.49 | 0     |
| <i>miR-186</i>    | - 3.27 | 0     |
| <i>miR-29c</i>    | - 3.11 | 0     |
| <i>miR-145</i>    | - 3.05 | 0     |
| <i>miR-195</i>    | - 3.03 | 0     |
| <i>miR-374</i>    | - 3.02 | 0     |
| <i>miR-126</i>    | - 2.89 | 0     |
| <i>miR-768-3p</i> | - 2.61 | 0     |
| <i>miR-497</i>    | - 2.61 | 0     |
| <i>let-7i</i>     | - 2.58 | 0     |
| <i>miR-143</i>    | - 2.49 | 0     |
| <i>miR-342</i>    | - 2.36 | 0     |
| <i>miR-30b</i>    | - 2.32 | 0     |
| <i>miR-142-3p</i> | - 2.29 | 0     |
| <i>let-7d</i>     | - 2.21 | 0     |
| <i>miR-365</i>    | - 2.07 | 0     |
| <i>miR-130a</i>   | - 2.05 | 0     |
| <i>miR-16</i>     | - 2.05 | 0     |
| <i>let-7a</i>     | - 2.03 | 0     |
| <i>let-7e</i>     | - 1.95 | 0     |
| <i>miR-126*</i>   | - 1.88 | 1.79  |
| <i>miR-146a</i>   | - 1.71 | 1.79  |
| <i>miR-27b</i>    | - 1.66 | 1.79  |
| <i>miR-30c</i>    | - 1.64 | 3.00  |
| <i>miR-23a</i>    | - 1.63 | 3.00  |
| <i>miR-98</i>     | - 1.60 | 3.00  |
| <i>miR-107</i>    | - 1.59 | 3.00  |
| <i>miR-100</i>    | - 1.48 | 5.48  |
| <i>miR-191</i>    | - 1.44 | 5.48  |
| <i>miR-148b</i>   | - 1.42 | 5.48  |
| <i>miR-10b</i>    | - 1.41 | 5.48  |
| <i>miR-223</i>    | - 1.32 | 7.73  |
| <i>miR-221</i>    | - 1.25 | 10.10 |
| <i>miR-7</i>      | - 1.19 | 14.31 |
| <i>miR-23b</i>    | - 1.17 | 14.31 |
| <i>miR-199a</i>   | - 1.14 | 14.31 |
| <i>miR-30a-5p</i> | - 1.11 | 17.25 |
| <i>miR-10a</i>    | - 1.02 | 17.25 |

---

Only miRNAs with FDR < 20% are listed

**Supplemental Table S4** Validation of differentially expressed miRNAs in DLBCLs vs. LNs by RT-qPCR

| miRNA             | DLBCLs (n=75) vs. LNs (n=6) | <i>P</i> -value |
|-------------------|-----------------------------|-----------------|
| <i>miR-150</i>    | Underexpressed in DLBCLs    | 0.01            |
| <i>miR-29b</i>    | Underexpressed in DLBCLs    | 0.03            |
| <i>miR-29a</i>    | Underexpressed in DLBCLs    | < 0.001         |
| <i>miR-142-3p</i> | Underexpressed in DLBCLs    | 0.03            |
| <i>miR-142-5p</i> | Underexpressed in DLBCLs    | < 0.01          |
| <i>miR-145</i>    | Underexpressed in DLBCLs    | 0.01            |
| <i>miR-143</i>    | Underexpressed in DLBCLs    | < 0.01          |
| <i>miR-195</i>    | Underexpressed in DLBCLs    | < 0.001         |
| <i>miR-497</i>    | Underexpressed in DLBCLs    | < 0.001         |
| <i>miR-494</i>    | Overexpressed in DLBCLs     | < 0.001         |
| <i>miR-638</i>    | Overexpressed in DLBCLs     | < 0.01          |
| <i>miR-21</i>     | Overexpressed in DLBCLs     | < 0.001         |
| <i>miR-155</i>    | Overexpressed in DLBCLs     | < 0.001         |

*P*-values were determined by unpaired *t*-test

**Supplemental Table S5** RT-qPCR analysis of differentially expressed miRNAs between *de novo* and transformed DLBCLs

| miRNA             | <i>de novo</i> (n=56) vs. transformed (n=19) DLBCLs | <i>P</i> -value |
|-------------------|-----------------------------------------------------|-----------------|
| <i>miR-103</i>    | Underexpressed in transformed DLBCLs                | 0.02            |
| <i>miR-107</i>    | Underexpressed in transformed DLBCLs                | < 0.01          |
| <i>miR-146a</i>   | Underexpressed in transformed DLBCLs                | < 0.001         |
| <i>miR-140</i>    | Overexpressed in transformed DLBCLs                 | 0.03            |
| <i>let-7i</i>     | Underexpressed in transformed DLBCLs                | < 0.01          |
| <i>miR-16</i>     | -                                                   | ns              |
| <i>miR-29b</i>    | -                                                   | ns              |
| <i>miR-155</i>    | Underexpressed in transformed DLBCLs                | < 0.001         |
| <i>miR-142-5p</i> | Underexpressed in transformed DLBCLs                | 0.04            |

*P*-values were determined by unpaired *t*-test

ns, not significant; -, no change

**Supplemental Table S6** Array-based SAM results for association between miRNAs expression and clinical/molecular features of *de novo* DLBCLs

| miRNA                                                          | Score (d) | q-value (%) |
|----------------------------------------------------------------|-----------|-------------|
| <b>GCB (n = 11) vs. non-GCB (n = 17)</b>                       |           |             |
| <i>Over-expressed miRNAs in non-GCB cases</i>                  |           |             |
| <i>let-7g</i>                                                  | 2.02      | 0           |
| <i>miR-155</i>                                                 | 1.72      | 0           |
| <i>miR-29c</i>                                                 | 1.48      | 0           |
| <i>miR-146a</i>                                                | 1.30      | 0           |
| <i>miR-451</i>                                                 | 1.30      | 0           |
| <i>miR-16</i>                                                  | 1.28      | 0           |
| <b>Positive (n = 10) vs. negative (n = 19) BCL6 expression</b> |           |             |
| <i>Under-expressed miRNAs in BCL6 positive cases</i>           |           |             |
| <i>miR-142-3p</i>                                              | - 2.34    | 0           |
| <i>miR-29a</i>                                                 | - 2.26    | 0           |
| <i>miR-142-5p</i>                                              | - 2.11    | 0           |
| <i>miR-101</i>                                                 | - 1.73    | 0           |
| <b>Positive (n = 15) vs. negative (n = 14) IRF4 expression</b> |           |             |
| <i>Under-expressed miRNAs in IRF4 positive cases</i>           |           |             |
| <i>miR-142-3p</i>                                              | - 2.60    | 0           |
| <i>miR-142-5p</i>                                              | - 2.57    | 0           |
| <i>miR-107</i>                                                 | - 2.09    | 0           |
| <i>miR-29b</i>                                                 | - 2.04    | 0           |
| <i>miR-425-5p</i>                                              | - 1.89    | 0           |
| <i>let-7g</i>                                                  | - 1.76    | 17.33       |
| <i>miR-103</i>                                                 | - 1.64    | 17.33       |
| <b>Stage I-II (n =15) vs. Stage III-IV (n = 17)</b>            |           |             |
| <i>Over-expressed miRNAs in stage III-IV DLBCLs</i>            |           |             |
| <i>miR-494</i>                                                 | 2.03      | 0           |

Only miRNAs with FDR < 20% are listed

**Supplemental Table S7** Correlation between clinical and tumor characteristics and gene expression levels of *DROSHA*, *DICER*, *TARBP2*, *DGCR8* and *PACT* in *de novo* cases of the cohort 1

| Parameter                    | No Cases | <i>DROSHA</i> |     |                 | <i>DICER</i> |     |                 | <i>TARBP2</i> |     |                 | <i>DGCR8</i> |     |                 | <i>PACT</i> |     |                 |
|------------------------------|----------|---------------|-----|-----------------|--------------|-----|-----------------|---------------|-----|-----------------|--------------|-----|-----------------|-------------|-----|-----------------|
|                              |          | high          | low | <i>P</i> -value | high         | low | <i>P</i> -value | high          | low | <i>P</i> -value | high         | low | <i>P</i> -value | high        | low | <i>P</i> -value |
| <b>Age</b>                   |          |               |     |                 |              |     |                 |               |     |                 |              |     |                 |             |     |                 |
| > 68                         | 26       | 15            | 11  | 0.28            | 11           | 15  | 0.28            | 15            | 11  | 0.28            | 13           | 15  | 1.00            | 13          | 15  | 1.00            |
| ≤ 68                         | 30       | 13            | 17  |                 | 17           | 13  |                 | 13            | 17  |                 | 15           | 15  |                 |             |     |                 |
| <b>Gender</b>                |          |               |     |                 |              |     |                 |               |     |                 |              |     |                 |             |     |                 |
| Male                         | 31       | 17            | 14  | 0.42            | 16           | 15  | 0.78            | 16            | 15  | 0.78            | 16           | 15  | 0.78            | 16          | 15  | 0.78            |
| Female                       | 25       | 11            | 14  |                 | 12           | 13  |                 | 12            | 13  |                 | 12           | 13  |                 |             |     |                 |
| <b>Disease stage</b>         |          |               |     |                 |              |     |                 |               |     |                 |              |     |                 |             |     |                 |
| I-II                         | 29       | 14            | 15  | 0.67            | 15           | 14  | 1               | 14            | 15  | 0.67            | 14           | 15  | 0.67            | 15          | 14  | 1               |
| III-IV                       | 24       | 13            | 11  |                 | 12           | 12  |                 | 13            | 11  |                 | 13           | 11  |                 |             |     |                 |
| <b>IPI</b>                   |          |               |     |                 |              |     |                 |               |     |                 |              |     |                 |             |     |                 |
| 0-2                          | 36       | 18            | 18  | 0.83            | 16           | 20  | 0.15            | 17            | 19  | 0.41            | 15           | 21  | <b>0.01</b>     | 18          | 18  | 0.51            |
| 3-5                          | 15       | 8             | 7   |                 | 10           | 5   |                 | 9             | 6   |                 | 12           | 3   |                 |             |     |                 |
| <b>GCB-phenotype</b>         |          |               |     |                 |              |     |                 |               |     |                 |              |     |                 |             |     |                 |
| GCB                          | 20       | 11            | 9   | 0.86            | 10           | 10  | 0.69            | 10            | 10  | 0.69            | 9            | 11  | 0.33            | 11          | 9   | 0.86            |
| non-GCB                      | 34       | 17            | 17  |                 | 18           | 16  |                 | 18            | 16  |                 | 19           | 15  |                 |             |     |                 |
| <b>CD10</b>                  |          |               |     |                 |              |     |                 |               |     |                 |              |     |                 |             |     |                 |
| Negative                     | 35       | 18            | 17  | 0.77            | 18           | 17  | 1               | 18            | 17  | 0.77            | 19           | 16  | 0.38            | 17          | 18  | 0.77            |
| Positive                     | 17       | 8             | 9   |                 | 9            | 8   |                 | 8             | 9   |                 | 7            | 10  |                 |             |     |                 |
| <b>BCL2</b>                  |          |               |     |                 |              |     |                 |               |     |                 |              |     |                 |             |     |                 |
| Negative                     | 16       | 10            | 6   | 0.19            | 9            | 7   | 0.75            | 9             | 7   | 0.61            | 8            | 8   | 1               | 10          | 6   | 0.19            |
| Positive                     | 37       | 16            | 21  |                 | 18           | 19  |                 | 18            | 19  |                 | 18           | 19  |                 |             |     |                 |
| <b>BCL6</b>                  |          |               |     |                 |              |     |                 |               |     |                 |              |     |                 |             |     |                 |
| Negative                     | 29       | 15            | 14  | 0.52            | 15           | 14  | 1               | 15            | 14  | 0.43            | 15           | 14  | 0.66            | 15          | 14  | 0.66            |
| Positive                     | 24       | 15            | 9   |                 | 12           | 12  |                 | 15            | 9   |                 | 11           | 13  |                 |             |     |                 |
| <b>IRF4</b>                  |          |               |     |                 |              |     |                 |               |     |                 |              |     |                 |             |     |                 |
| Negative                     | 21       | 8             | 13  | 0.19            | 9            | 12  | 0.34            | 7             | 14  | 0.06            | 8            | 13  | 0.19            | 8           | 13  | 0.19            |
| Positive                     | 32       | 18            | 14  |                 | 18           | 14  |                 | 19            | 13  |                 | 18           | 14  |                 |             |     |                 |
| <b>Response to treatment</b> |          |               |     |                 |              |     |                 |               |     |                 |              |     |                 |             |     |                 |
| CR                           | 38       | 17            | 21  | <b>0.04</b>     | 19           | 19  | 0.29            | 15            | 23  | <b>0.02</b>     | 20           | 18  | 0.72            | 19          | 19  | 0.82            |
| no CR                        | 7        | 6             | 1   |                 | 5            | 2   |                 | 6             | 1   |                 | 4            | 3   |                 |             |     |                 |

CR, complete response; no CR, no complete response

*P*-values were determined by  $\chi^2$ -test



**Supplemental Table S8** Correlation between clinical and tumor characteristics and gene expression levels of *DROSHA*, *DICER*, *TARBP2*, *DGCR8* and *PACT* in *de novo* cases of the cohort 2

| Parameter                    | No Cases | <i>DROSHA</i> |     |                 | <i>DICER</i> |     |                 | <i>TARBP2</i> |     |                 | <i>DGCR8</i> |     |                 | <i>PACT</i> |     |                 |
|------------------------------|----------|---------------|-----|-----------------|--------------|-----|-----------------|---------------|-----|-----------------|--------------|-----|-----------------|-------------|-----|-----------------|
|                              |          | high          | low | <i>P</i> -value | high         | low | <i>P</i> -value | high          | low | <i>P</i> -value | high         | low | <i>P</i> -value | high        | low | <i>P</i> -value |
| <b>Age</b>                   |          |               |     |                 |              |     |                 |               |     |                 |              |     |                 |             |     |                 |
| > 63                         | 18       | 10            | 8   | 0.62            | 11           | 7   | 0.25            | 8             | 10  | 0.41            | 10           | 8   | 0.41            | 11          | 7   | 0.25            |
| ≤ 63                         | 19       | 9             | 10  |                 | 8            | 11  |                 | 11            | 8   |                 | 11           | 8   |                 | 11          |     |                 |
| <b>Gender</b>                |          |               |     |                 |              |     |                 |               |     |                 |              |     |                 |             |     |                 |
| Male                         | 13       | 11            | 13  | 0.36            | 13           | 11  | 0.64            | 14            | 10  | 0.25            | 10           | 14  | 0.25            | 11          | 13  | 0.36            |
| Female                       | 24       | 8             | 5   |                 | 6            | 7   |                 | 5             | 8   |                 | 8            | 5   |                 | 8           |     |                 |
| <b>Disease stage</b>         |          |               |     |                 |              |     |                 |               |     |                 |              |     |                 |             |     |                 |
| I-II                         | 24       | 14            | 10  | 0.16            | 10           | 14  | 0.16            | 14            | 10  | 0.35            | 10           | 14  | 0.64            | 11          | 13  | 0.81            |
| III-IV                       | 12       | 4             | 8   |                 | 8            | 4   |                 | 5             | 7   |                 | 6            | 6   |                 |             |     |                 |
| <b>IPI</b>                   |          |               |     |                 |              |     |                 |               |     |                 |              |     |                 |             |     |                 |
| 0-2                          | 27       | 13            | 14  | 0.70            | 12           | 15  | 0.25            | 14            | 13  | 0.85            | 15           | 12  | 0.25            | 11          | 16  | 0.06            |
| 3-5                          | 9        | 5             | 4   |                 | 6            | 3   |                 | 5             | 4   |                 | 3            | 6   |                 | 7           | 2   |                 |
| <b>GCB-phenotype</b>         |          |               |     |                 |              |     |                 |               |     |                 |              |     |                 |             |     |                 |
| GCB                          | 18       | 8             | 10  | 0.62            | 9            | 9   | 0.86            | 5             | 13  | <b>0.004</b>    | 8            | 10  | 0.62            | 9           | 9   | 0.86            |
| non-GCB                      | 17       | 9             | 8   |                 | 9            | 8   |                 | 13            | 4   |                 | 9            | 8   |                 | 8           | 9   |                 |
| <b>CD10</b>                  |          |               |     |                 |              |     |                 |               |     |                 |              |     |                 |             |     |                 |
| Negative                     | 23       | 12            | 11  | 0.55            | 12           | 11  | 1               | 14            | 9   | 0.12            | 13           | 10  | 0.19            | 11          | 12  | 1               |
| Positive                     | 12       | 5             | 7   |                 | 6            | 6   |                 | 4             | 8   |                 | 4            | 8   |                 | 6           | 6   |                 |
| <b>BCL2</b>                  |          |               |     |                 |              |     |                 |               |     |                 |              |     |                 |             |     |                 |
| Negative                     | 9        | 5             | 4   | 1               | 4            | 5   | 0.19            | 3             | 6   | 0.08            | 6            | 3   | 0.18            | 4           | 5   | 0.65            |
| Positive                     | 11       | 6             | 5   |                 | 8            | 3   |                 | 8             | 3   |                 | 4            | 7   |                 | 6           | 5   |                 |
| <b>BCL6</b>                  |          |               |     |                 |              |     |                 |               |     |                 |              |     |                 |             |     |                 |
| Negative                     | 15       | 8             | 7   | 0.63            | 8            | 7   | 0.85            | 10            | 5   | 0.12            | 6            | 9   | 0.38            | 5           | 10  | 0.12            |
| Positive                     | 20       | 9             | 11  |                 | 10           | 10  |                 | 8             | 12  |                 | 11           | 9   |                 | 12          | 8   |                 |
| <b>IRF4</b>                  |          |               |     |                 |              |     |                 |               |     |                 |              |     |                 |             |     |                 |
| Negative                     | 16       | 8             | 8   | 0.88            | 11           | 5   | 0.06            | 6             | 10  | 0.13            | 7            | 9   | 0.60            | 10          | 6   | 0.13            |
| Positive                     | 19       | 9             | 10  |                 | 7            | 12  |                 | 12            | 7   |                 | 10           | 9   |                 | 7           | 12  |                 |
| <b>Response to treatment</b> |          |               |     |                 |              |     |                 |               |     |                 |              |     |                 |             |     |                 |
| CR                           | 18       | 6             | 12  | <b>0.03</b>     | 8            | 10  | 0.81            | 8             | 10  | 0.81            | 9            | 9   | 1               | 7           | 11  | 0.06            |
| no CR                        | 6        | 5             | 1   |                 | 3            | 3   |                 | 3             | 3   |                 | 3            | 3   |                 | 5           | 1   |                 |

CR, complete response; no CR, no complete response

*P*-values were determined by  $\chi^2$ -test
